# Supplementary material
Source: Springer Nature journal article supplement (https://www.springermedizin.de/resource/supplementary/13005_2006_81_MOESM2_ESM.pdf/9626220)
Supplement: MOESM2 [file 9626220]

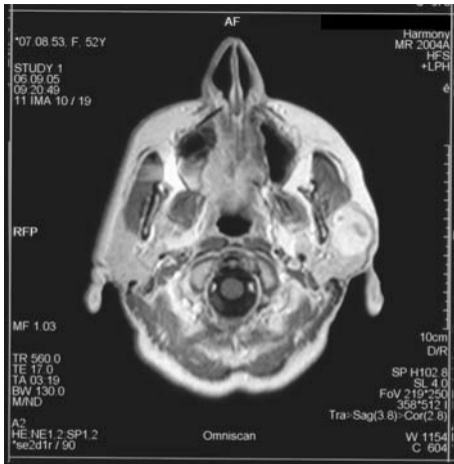

MRI axial T1-weighted image

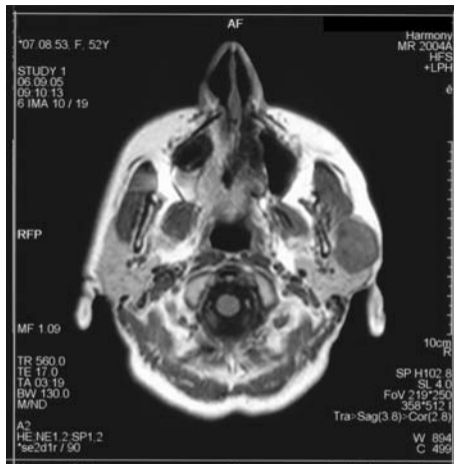

MRI contrast enhanced  
axial T1-weighted image

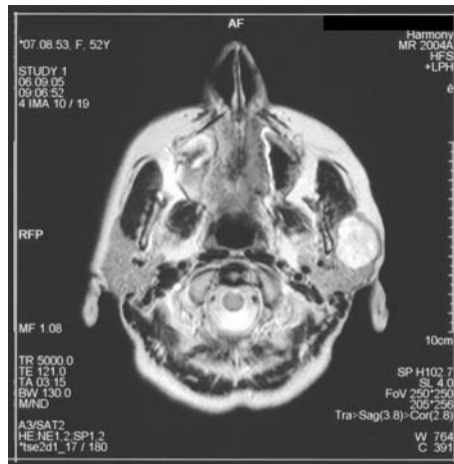

MRI axial T2-weighted image
